# Supplementary material for: Visible and NIR emitting Yb(iii) and Er(iii) complexes sensitized by β-diketonates and phenanthroline derivatives
Source: Royal Society of Chemistry journal article supplement (doi:10.1039/d0ra05539e), 2020-01-01
Supplement: d0ra05539e1.pdf [file d0ra05539e1.pdf]

## Electronic Supplementary Information (ESI)

### Visible and NIR emitting Yb(III) and Er(III) complexes sensitized by $\beta$ -diketonates and phenanthroline derivatives

Gabriela Brito-Santos,<sup>a</sup> Beatriz Gil-Hernández,<sup>ab</sup> Inocencio R. Martín,<sup>bc</sup> Ricardo Guerrero-Lemus<sup>bc</sup> and Joaquín Sanchiz<sup>\*ab</sup>

<sup>a</sup> Departamento de Química, Facultad de Ciencias, Universidad de La Laguna, Tenerife, 38206, Spain.

<sup>b</sup> Instituto de Materiales y Nanotecnología, Universidad de La Laguna, Tenerife, 38206, Spain.

<sup>c</sup> Departamento de Física, Facultad de Ciencias, Universidad de La Laguna, Tenerife, 38206, Spain.

#### Index

Fig. S1-S3 View of the structures of the complexes **2**, **4** and **5**

Fig. S4-S6 Experimental and simulated powder X-ray diffraction patterns of the complexes

Fig. S7 Photoluminescence spectra of me-phen ligand and [Gd(me-phen)(bta)<sub>3</sub>] (**3**) complex excited a 375 nm.

Table S1-S3. Distances and angles for the shortest  $\pi$ - $\pi$  interactions in **2**, **4** and **5**.

Table S4. Selected geometric parameters ( $\text{\AA}$ ,  $^\circ$ ) for compounds **2**, **4** and **5**.

#### Abbreviations

Hbta = benzoyltrifluoroacetone

Htta = 2-thenoyltrifluoroacetone

me-phen = 5-methyl-1,10-phenanthroline

pyz-phen = pyrazino[2,3-f][1,10]phenanthroline

[Er(bta)<sub>3</sub>(me-phen)] (**1**), [Yb(bta)<sub>3</sub>(me-phen)] (**2**), [Gd(bta)<sub>3</sub>(me-phen)] (**3**),

[Yb(bta)<sub>3</sub>(pyz-phen)] (**4**), and [Er(tta)<sub>3</sub>(pyz-phen)] (**5**)

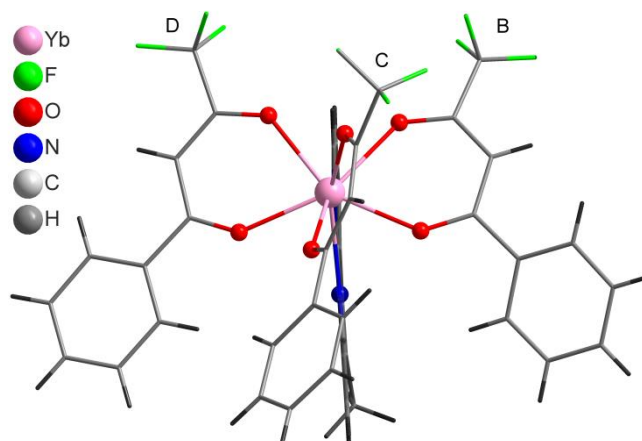

Fig. S1 Molecular structure of **2** with the bta<sup>-</sup> ligands labelled as B, C and D.

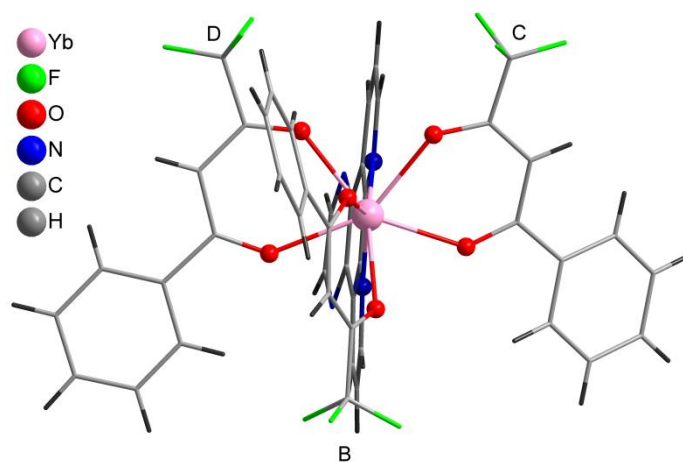

Fig. S2 Molecular structure of **4** with the bta<sup>-</sup> ligands labelled as B, C and D.

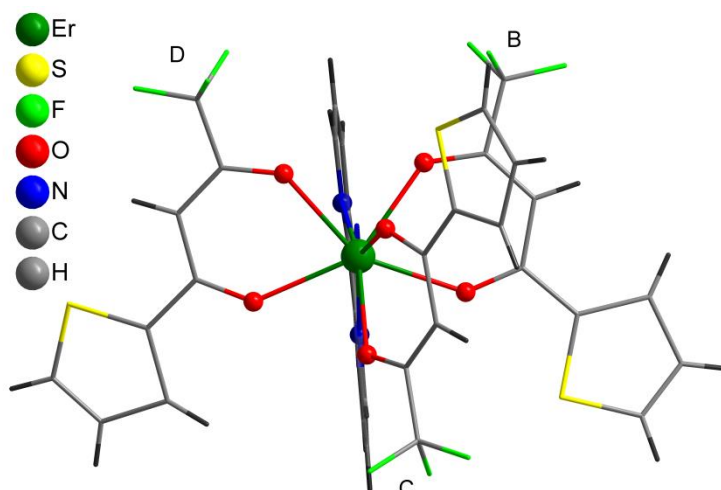

Fig. S3 Molecular structure of **5** with the tta<sup>-</sup> ligands labelled as B, C and D.

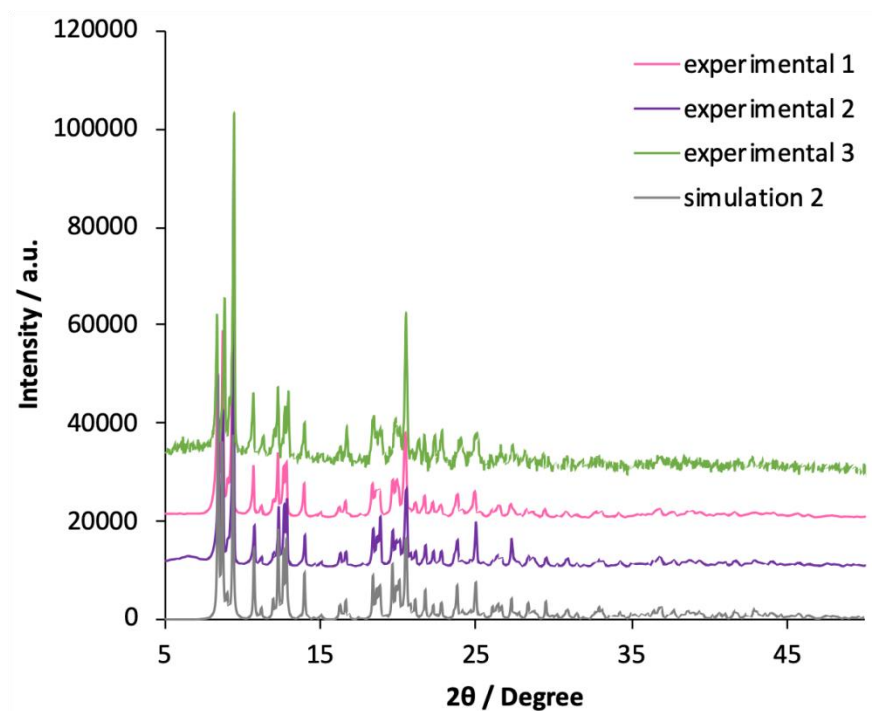

Fig. S4 Powder diffraction patterns of **1 - 3**, together with the simulation of **2** from the single crystal X-ray structure.

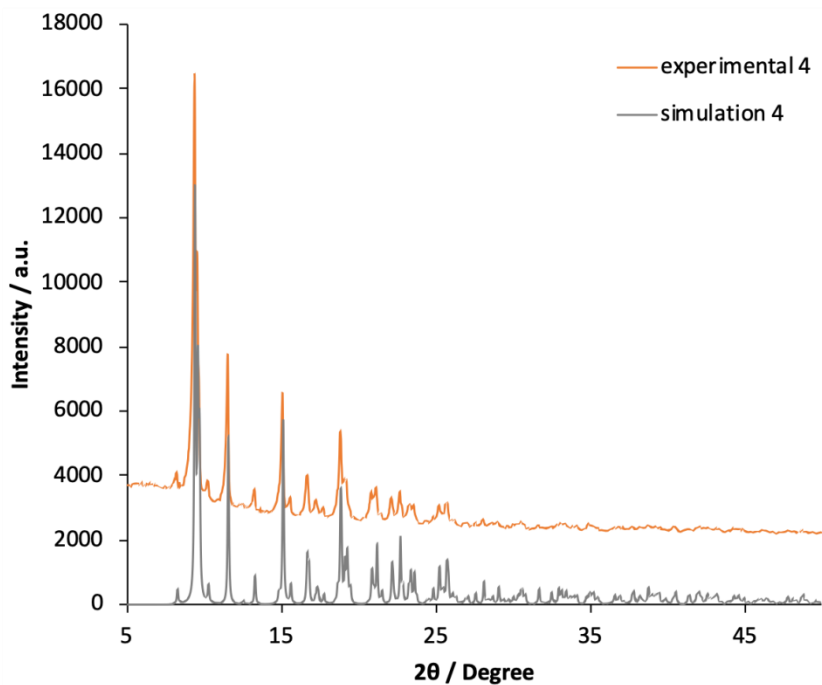

Fig. S5 Powder diffraction pattern of **4** compared with the simulation from single crystal

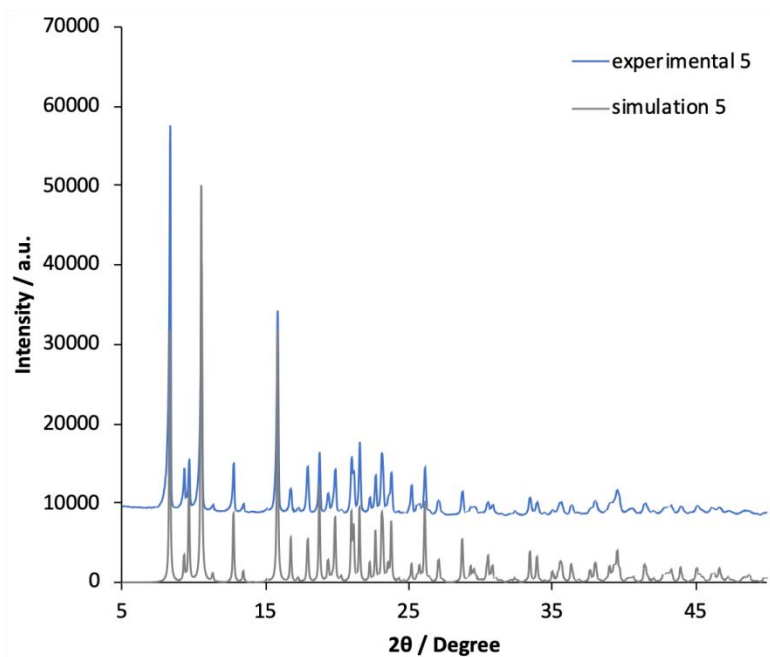

Fig. S6 Powder diffraction pattern of **5** compared with the simulation from single crystal.

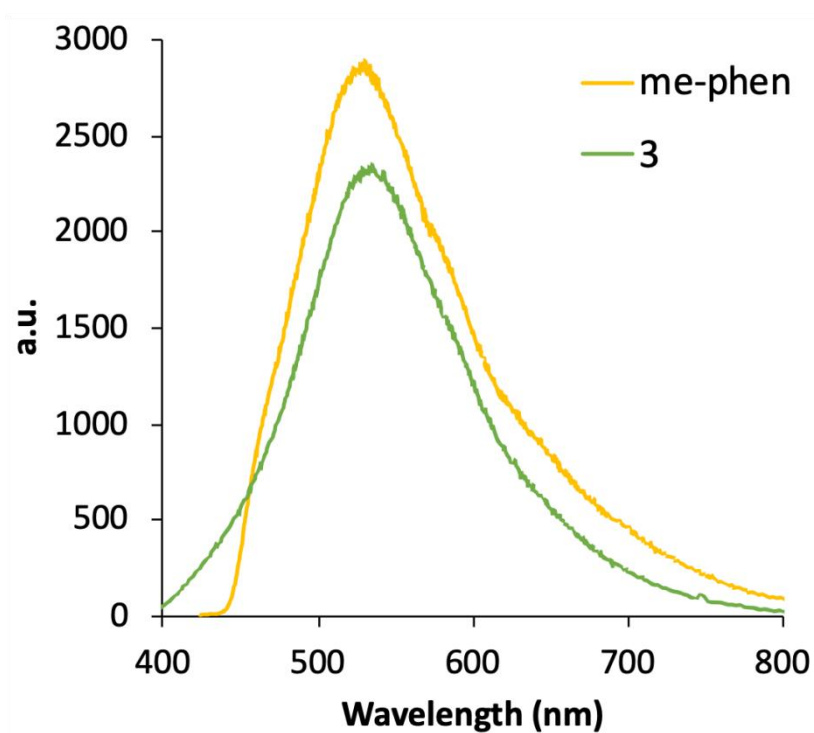

Fig. S7 Photoluminescence spectra of me-phen ligand and  $[\text{Gd}(\text{me-phen})(\text{bta})_3]$  (**3**) complex excited at 375 nm.

**Table S1.** Distances [Å] and angles [°] for the shortest  $\pi$ - $\pi$  interactions in [Yb(bta)<sub>3</sub>(me-phen)](2).

| $\pi$ - $\pi$ interaction<br>Cg(I)⋯Cg(J) | d[Cg(I)⋯Cg(J)] | $\alpha$ | $\beta$ | $\gamma$ | d[Cg1⋯P <sub>2</sub> ] | d[Cg2⋯P <sub>1</sub> ] |
|------------------------------------------|----------------|----------|---------|----------|------------------------|------------------------|
| Cg1⋯Cg2 <sup>i</sup>                     | 3.931(5)       | 26.1     | 8.4     | 31.8     | 3.339                  | 3.889                  |

Cg: ring centroid;  $\alpha$ : dihedral angle between planes I and J,  $\beta$ : Angle between Cg(I)-Cg(J) vector and normal to plane;  $\gamma$ : Angle between Cg(I) and Cg(J) vector and normal to plane J Cg⋯P: perpendicular distance of Cg on ring plane P; d  
Cg1: C4A-C5A-C6A-C7A-C11A-C12A; Cg2: C5B-C6B-C7B-C8B-C9B-C10B

Symmetry transformations:  $i=x, 1/2-y, 1/2+z$

**Table S2.** Distances [Å] and angles [°] for the shortest  $\pi$ - $\pi$  interactions in [Yb(bta)<sub>3</sub>(pyz-phen)](4).

| $\pi$ - $\pi$ interaction<br>Cg(I)⋯Cg(J) | d[Cg(I)⋯Cg(J)] | $\alpha$ | $\beta$ | $\gamma$ | d[Cg1⋯P <sub>2</sub> ] | d[Cg2⋯P <sub>1</sub> ] |
|------------------------------------------|----------------|----------|---------|----------|------------------------|------------------------|
| Cg1⋯Cg2 <sup>i</sup>                     | 3.711(11)      | 12       | 14      | 11.2     | 3.669                  | 3.659                  |
| Cg1⋯Cg3 <sup>ii</sup>                    | 3.724(10)      | 3.4      | 23.3    | 26.6     | 3.330                  | 3.422                  |
| Cg4⋯Cg3 <sup>ii</sup>                    | 3.685(6)       | 3.8      | 21      | 24.6     | 3.351                  | 3.441                  |

Cg: ring centroid;  $\alpha$ : dihedral angle between planes I and J,  $\beta$ : Angle between Cg(I)-Cg(J) vector and normal to plane;  $\gamma$ : Angle between Cg(I) and Cg(J) vector and normal to plane J Cg⋯P: perpendicular distance of Cg on ring plane P; d  
Cg1: N3A-C5A-C6A-N4A-C14A-C13A; Cg2: C5B-C6B-C7B-C8B-C9B- C10B; Cg3: C5C-C6C-C7C-C8C-C9C-C10C; Cg4: C4A-C5A-C6A-C7A-C11A- C12A

Symmetry transformations:  $i=-1/2+x, 3/2-y, z$   $ii= 1-x, 1-y, 1/2+z$

**Table S3.** Distances [Å] and angles [°] for the shortest  $\pi$ - $\pi$  interactions in [Er(tta)<sub>3</sub>(pyz-phen)](5).

| $\pi$ - $\pi$ interaction<br>Cg(I)⋯Cg(J) | d[Cg(I)⋯Cg(J)] | $\alpha$ | $\beta$ | $\gamma$ | d[Cg1⋯P <sub>2</sub> ] | d[Cg2⋯P <sub>1</sub> ] |
|------------------------------------------|----------------|----------|---------|----------|------------------------|------------------------|
| Cg1⋯Cg2 <sup>i</sup>                     | 3.795(7)       | 3.7      | 24.8    | 22.3     | 3.509                  | 3.445                  |
| Cg1⋯Cg3 <sup>i</sup>                     | 3.726(8)       | 5.2      | 17.1    | 21.8     | 3.459                  | 3.561                  |

Cg: ring centroid;  $\alpha$ : dihedral angle between planes I and J,  $\beta$ : Angle between Cg(I)-Cg(J) vector and normal to plane;  $\gamma$ : Angle between Cg(I) and Cg(J) vector and normal to plane J Cg⋯P: perpendicular distance of Cg on ring plane P; d  
Cg1: S2D-C5D-C6D-C7D-C8D; Cg2: N3A-C5A-C6A-N4A-C14A-C13A; Cg3: C4A-C5A-C6A-C7A-C11A-C12A.

Symmetry transformations:  $i= 1/2-x, -1/2+y, z$ .

**Table S4.** Selected geometric parameters (Å, °) for compounds **2**, **4** and **5**

| Compound <b>2</b> |             | Compound <b>4</b> |             | Compound <b>5</b> |             |
|-------------------|-------------|-------------------|-------------|-------------------|-------------|
| Yb1—O2D           | 2.263 (4)   | Yb01—O2D          | 2.263 (4)   | Er1—O2C           | 2.270 (3)   |
| Yb1—O2C           | 2.271 (4)   | Yb01—O2B          | 2.264 (5)   | Er1—O1D           | 2.290 (3)   |
| Yb1—O1C           | 2.282 (4)   | Yb01—O2C          | 2.274 (5)   | Er1—O2B           | 2.306 (3)   |
| Yb1—O2B           | 2.283 (4)   | Yb01—O1B          | 2.277 (5)   | Er1—O1B           | 2.311 (3)   |
| Yb1—O1D           | 2.286 (4)   | Yb01—O1C          | 2.278 (4)   | Er1—O2D           | 2.311 (3)   |
| Yb1—O1B           | 2.319 (4)   | Yb01—O1D          | 2.288 (5)   | Er1—O1C           | 2.320 (3)   |
| Yb1—N1A           | 2.491 (5)   | Yb01—N2A          | 2.499 (7)   | Er1—N2A           | 2.518 (4)   |
| Yb1—N2A           | 2.524 (5)   | Yb01—N1A          | 2.512 (7)   | Er1—N1A           | 2.543 (4)   |
|                   |             |                   |             |                   |             |
| O1C—Yb1—O1B       | 74.41 (18)  | O1B—Yb01—O1C      | 120.8 (2)   | O1B—Er1—O1C       | 133.18 (12) |
| O2C—Yb1—O1B       | 137.45 (17) | O2C—Yb01—O1B      | 77.03 (19)  | O2C—Er1—O1B       | 73.74 (14)  |
| O1D—Yb1—O1B       | 80.08 (15)  | O1B—Yb01—O1D      | 137.00 (19) | O1D—Er1—O1B       | 78.25 (12)  |
| O2D—Yb1—O1B       | 147.37 (16) | O2D—Yb01—O1B      | 77.07 (19)  | O1B—Er1—O2D       | 147.06 (11) |
| O1B—Yb1—N2A       | 116.29 (17) | O1B—Yb01—N1A      | 144.4 (2)   | O1B—Er1—N1A       | 70.77 (14)  |
| O1B—Yb1—N1A       | 73.10 (17)  | O1B—Yb01—N2A      | 80.5 (2)    | O1B—Er1—N2A       | 117.00 (13) |
| O2B—Yb1—O1B       | 73.30 (15)  | O2B—Yb01—O1B      | 72.9 (2)    | O2B—Er1—O1B       | 72.97 (11)  |
| O2C—Yb1—O1C       | 73.35 (17)  | O2C—Yb01—O1C      | 72.66 (16)  | O2C—Er1—O1C       | 72.67 (13)  |
| O2D—Yb1—O1D       | 73.61 (15)  | O2D—Yb01—O1D      | 73.10 (17)  | O1D—Er1—O2D       | 73.33 (12)  |
| N1A—Yb1—N2A       | 64.46 (19)  | N2A—Yb01—N1A      | 65.0 (3)    | N2A—Er1—N1A       | 64.09 (12)  |
